# Supplementary material for: Equity in the Access of Chinese Immigrants to Healthcare Services in Portugal
Source: MDPI journal article supplement (doi:10.3390/ijerph20032442), 2023-01-30
Supplement: s1 [file s1]

**Table S1.** Healthcare providers used by the Chinese population residing in mainland Portugal (n = 284).

| Healthcare Services Used                | None |      | Chinese Doctor |     | Doctor of Another Nationality |      |
|-----------------------------------------|------|------|----------------|-----|-------------------------------|------|
|                                         | n    | %    | n              | %   | n                             | %    |
| Health Centre                           | 19   | 6.7  | 19             | 6.7 | 246                           | 86.6 |
| Physiotherapy's clinic                  | 265  | 93.3 | 3              | 1.1 | 16                            | 5.69 |
| Private Clinic / Hospital               | 198  | 69.7 | 19             | 6.4 | 68                            | 23.9 |
| Dental Care Clinic                      | 192  | 67.6 | 5              | 1.8 | 87                            | 30.6 |
| Pharmacy                                | 37   | 13   | 19             | 6.7 | 228                           | 80.3 |
| Public hospital                         | 48   | 16.9 | 22             | 7.7 | 214                           | 75.4 |
| INEM                                    | 268  | 94.4 | 2              | 0.7 | 14                            | 4.9  |
| Healthcare 24h<br>(online service 24/7) | 274  | 96.5 | 0              | 0   | 10                            | 3.5  |
| Emergency Service                       | 201  | 70.8 | 5              | 1.6 | 78                            | 25.7 |

Each participant could choose more than one option (hence the sum being >284).

**Table S2.** Health reasons for seeking healthcare in Portugal.

| Reasons (n=304)            | Western Medicine<br>(Public and Private Sectors) | TCM     | TCM/Western Medicine<br>(Public and Private Sectors) | None       | All     |
|----------------------------|--------------------------------------------------|---------|------------------------------------------------------|------------|---------|
|                            | n (%)                                            | n (%)   | n (%)                                                | n (%)      | n (%)   |
| Car Accident               | 10 (3.5)                                         | 0 (0)   | 0 (0)                                                | 274 (96.5) | 0 (0)   |
| Personal Accident          | 21 (7.4)                                         | 1 (0.4) | 5 (1.8)                                              | 256 (90.1) | 1 (0.4) |
| Work Accident              | 20 (7.1)                                         | 1 (0.4) | 1 (0.4)                                              | 261 (91.9) | 1 (0.4) |
| Chronic Disease Monitoring | 227 (79.9)                                       | 1 (0.4) | 14 (4.9)                                             | 42 (14.8)  | 0 (0)   |
| Pregnancy Monitoring       | 68 (24)                                          | 0 (0)   | 4 (1.4)                                              | 212 (74.6) | 0 (0)   |
| Preventive Care            | 74 (26.1)                                        | 6 (2.1) | 18 (6.3)                                             | 186 (65.5) | 0 (0)   |
| Childbirth                 | 71 (25)                                          | 0 (0)   | 0 (0)                                                | 213 (75)   | 0 (0)   |
| Children's health          | 78 (27.5)                                        | 0 (0)   | 0 (0)                                                | 206 (72.5) | 0 (0)   |
| Vaccination                | 70 (24.7)                                        | 0 (0)   | 0 (0)                                                | 214 (75.4) | 0 (0)   |
| Dentistry                  | 57 (20.1)                                        | 0 (0)   | 0 (0)                                                | 227 (79.9) | 0 (0)   |
| Surgical treatment         | 30 (10.6)                                        | 0 (0)   | 0 (0)                                                | 254 (89.4) | 0 (0)   |
| Medical treatment          | 46 (16.2)                                        | 0 (0)   | 0 (0)                                                | 238 (83.8) | 0 (0)   |
| Radiotherapy               | 4 (1.5)                                          | 0 (0)   | 0 (0)                                                | 280 (98.6) | 0 (0)   |
| Chemotherapy               | 3 (1.1)                                          | 0 (0)   | 0 (0)                                                | 281 (98.9) | 0 (0)   |
| Cold - Flu                 | 137 (48.2)                                       | 4 (1.4) | 9 (3.2)                                              | 134 (47.2) | 0 (0)   |
| Diarrhoea                  | 35 (12.3)                                        | 1 (0.4) | 4 (1.4)                                              | 244 (85.9) | 0 (0)   |
| Vomit                      | 34 (12)                                          | 1 (0.4) | 3 (1.1)                                              | 246 (86.6) | 0 (0)   |
| Diabetes                   | 14 (4.9)                                         | 0 (0)   | 1 (0.4)                                              | 269 (94.7) | 0 (0)   |
| Heart disease              | 10 (3.5)                                         | 0 (0)   | 1 (0.4)                                              | 273 (96.1) | 0 (0)   |
| Oncological Disease        | 4 (1.5)                                          | 0 (0)   | 2 (0.7)                                              | 277 (97.5) | 1 (0.4) |
| Liver disease              | 10 (3.5)                                         | 1 (0.4) | 0 (0)                                                | 273 (96.1) | 0 (0)   |
| Respiratory disease        | 24 (8.5)                                         | 3 (1.1) | 6 (2.1)                                              | 251 (88.4) | 0 (0)   |
| Neurological Disease       | 6 (2.1)                                          | 0 (0)   | 2 (0.7)                                              | 276 (97.2) | 0 (0)   |
| Psychiatric Disease        | 12 (4.3)                                         | 1 (0.4) | 1 (0.4)                                              | 270 (95.1) | 0 (0)   |
| Musculoskeletal Disease    | 19 (6.7)                                         | 0 (0)   | 5 (1.8)                                              | 258 (90.8) | 2 (0.7) |
| Stomach/Intestine Disease  | 48 (16.9)                                        | 1 (0.4) | 9 (3.2)                                              | 225 (79.2) | 1 (0.4) |
| Other                      | 8 (2.8)                                          | 0 (0)   | 0 (0)                                                | 276 (97.2) | 0 (0)   |
| Clinical analysis          | 274 (96.5)                                       | 0 (0)   | 1 (0.4)                                              | 9 (3.2)    | 0 (0)   |
| Ultrasound                 | 174 (61.2)                                       | 0 (0)   | 0 (0)                                                | 110 (38.7) | 0 (0)   |
| CAT scan                   | 109 (38.4)                                       | 0 (0)   | 0 (0)                                                | 175 (61.6) | 0 (0)   |
| NMR                        | 26 (9.2)                                         | 0 (0)   | 0 (0)                                                | 258 (90.8) | 0 (0)   |
| X-ray                      | 81 (28.5)                                        | 0 (0)   | 0 (0)                                                | 203 (71.5) | 0 (0)   |
| PET scan                   | 9 (3.2)                                          | 0 (0)   | 0 (0)                                                | 275 (96.8) | 0 (0)   |
| Other                      | 38 (13.4)                                        | 0 (0)   | 0 (0)                                                | 246 (86.6) | 0 (0)   |

**Table S3.** Health reasons for seeking healthcare in China (n=165).

| <b>Health Problem</b>      | <b>n</b> | <b>%</b> |
|----------------------------|----------|----------|
| Chronic Disease Monitoring | 140      | 84.8     |
| Preventive Care            | 63       | 38.2     |
| Stomach-Intestine Disease  | 42       | 25.5     |
| Musculoskeletal Disease    | 26       | 15.8     |
| Medical treatment          | 17       | 10.3     |
| Respiratory disease        | 16       | 9.7      |
| Surgical treatment         | 13       | 7.9      |
| Work Accident              | 12       | 7.3      |
| Liver Disease              | 9        | 5.5      |
| Heart disease              | 8        | 4.8      |
| Psychiatric Disease        | 8        | 4.8      |
| Pregnancy Monitoring       | 7        | 4.2      |
| Diabetes                   | 7        | 4.2      |
| Oncological Disease        | 7        | 4.2      |
| Other                      | 7        | 4.2      |
| Vaccination                | 6        | 3.6      |
| Neurological Disease       | 6        | 3.6      |
| Personal accident          | 6        | 3.6      |
| Childbirth                 | 4        | 2.4      |
| Children's health          | 4        | 2.4      |
| Chemotherapy               | 3        | 1.8      |
| Radiotherapy               | 2        | 1.2      |
| Dentistry                  | 0        | 0        |
| Car Accident               | 0        | 0        |

Each participant could choose more than one option (hence the sum being > 165).
